# Supplementary material
Source: publisher figshare collection journal article supplement (https://acs.figshare.com/ndownloader/files/8595121)
Supplement: Supplementary file 1 [file 8595121]

# **$R_3\text{Au}_9Pn$ ( $R = \text{Y, Gd-Tm}$ ; $Pn = \text{Sb, Bi}$ ): A Link between $\text{Cu}_{10}\text{Sn}_3$ and $\text{Gd}_{14}\text{Ag}_{51}$**

Chris Celania,<sup>†,‡</sup> Volodymyr Smetana,<sup>†,‡</sup> Alessia Provino,<sup>†,§,⊥</sup> Vitalij Pecharsky,<sup>†,‡</sup> Pietro Manfrinetti,<sup>†,§,⊥</sup> Anja-Verena Mudring<sup>†,‡,&\*</sup>

<sup>†</sup>*The Ames Laboratory, U.S. Department of Energy, Iowa State University, Ames, IA 50011, USA*

<sup>‡</sup>*Department of Materials Science and Engineering, Iowa State University, Ames, IA 50011, USA*

<sup>§</sup>*Department of Chemistry, University of Genova, Via Dodecaneso 31, 16146 Genova, Italy*

<sup>⊥</sup>*Institute SPIN-CNR, Corso Perrone 24, 16152 Genova, Italy*

<sup>§</sup>*Department of Materials and Environmental Chemistry, Stockholm University, Svante Arrhenius väg 16C, 10691 Stockholm, Sweden; email: anja-verena.mudring@mmk.su.se*

## Supporting Information

**Table S1.** Summary of the thermal synthesis techniques used for each sample including: high temperature reactions in tube furnaces, annealing in tube furnaces, Differential Thermal Analysis (DTA), and arc melting.

| <b><math>R_3\text{Au}_9\text{Pn}</math></b> | <b>Thermal Treatment</b>                                      |
|---------------------------------------------|---------------------------------------------------------------|
| Gd <sub>3</sub> Au <sub>9</sub> Sb          | 1000°C for 3 hrs, annealed at 850°C for 12 hrs                |
| Tb <sub>3</sub> Au <sub>9</sub> Sb          | DTA, annealed at 960°C for 5 days                             |
| Dy <sub>3</sub> Au <sub>9</sub> Sb          | 1050°C for 5 hrs, annealed at 850 for 72 hrs                  |
| Ho <sub>3</sub> Au <sub>9</sub> Sb          | 900°C for 10 days                                             |
| Er <sub>3</sub> Au <sub>9</sub> Sb          | 900°C for 7 days                                              |
| Tm <sub>3</sub> Au <sub>9</sub> Sb          | Arc melted                                                    |
| Y <sub>3</sub> Au <sub>9</sub> Sb           | DTA, annealed at 900°C for 10 days                            |
| Gd <sub>3</sub> Au <sub>9</sub> Bi          | Arc melted, annealed at 850°C for 2 days and 700°C for 5 days |

**Table S2.** Anisotropic displacement parameters  $U_{ij}$  [ $\text{\AA}^2$ ] for Gd<sub>3</sub>Au<sub>9</sub>Sb.

| <b>Atom</b> | <b><math>U_{11}</math></b> | <b><math>U_{22}</math></b> | <b><math>U_{33}</math></b> | <b><math>U_{12}</math></b> | <b><math>U_{13}</math></b> | <b><math>U_{23}</math></b> |
|-------------|----------------------------|----------------------------|----------------------------|----------------------------|----------------------------|----------------------------|
| Au1         | 0.00202(17)                | 0.00202(17)                | 0.0064(3)                  | 0.000                      | 0.000                      | 0.00101(9)                 |
| Au2         | 0.00436(18)                | 0.00506(18)                | 0.00296(18)                | -0.00150(12)               | -0.00125(13)               | 0.00292(14)                |
| Au3         | 0.0028(2)                  | 0.0028(2)                  | 0.0107(5)                  | 0.000                      | 0.000                      | 0.00138(12)                |
| Gd          | 0.0025(3)                  | 0.0018(3)                  | 0.0013(3)                  | 0.000                      | 0.000                      | 0.0017(2)                  |
| Sb          | 0.0007(4)                  | 0.0007(4)                  | 0.0015(7)                  | 0.000                      | 0.000                      | 0.00037(18)                |

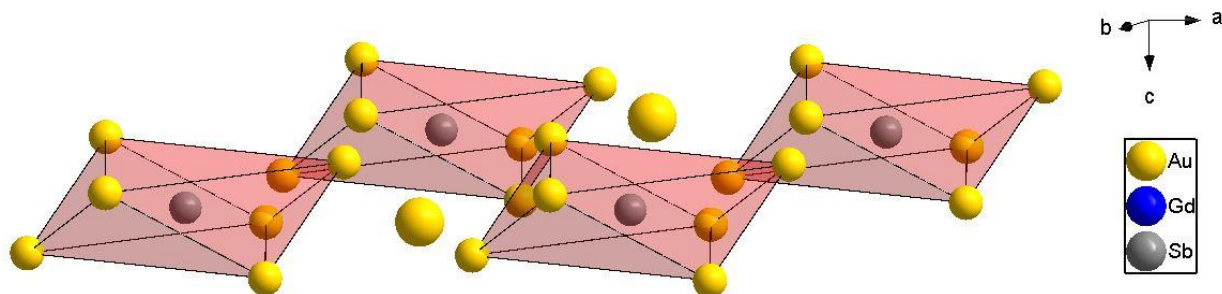

**Figure S1.** View of the isolated Sb@Au<sub>6</sub> trigonal prisms in Gd<sub>3</sub>Au<sub>9</sub>Sb. The unbound (slightly larger for differentiation) Au atoms represent the caps of the Au@Au<sub>8</sub> clusters in neighboring layers.

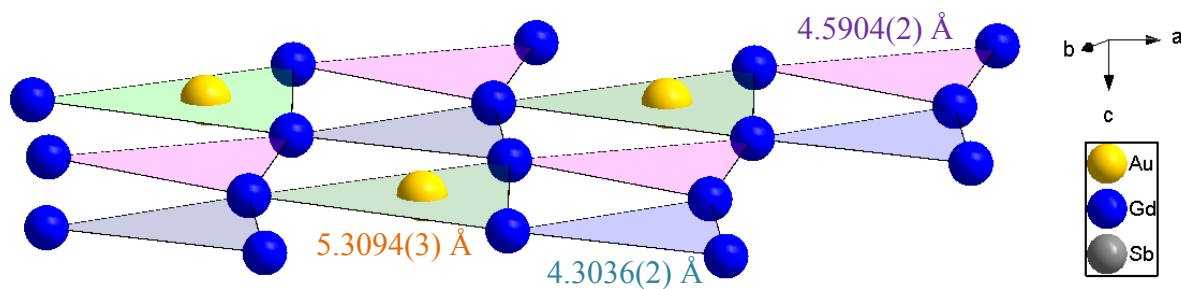

**Figure S2.** A view of the Gd trigonal planes in Gd<sub>3</sub>Au<sub>9</sub>Sb and interatomic atomic distances within each triangle. The green planes are centered by the central atom of the Au@Au<sub>8</sub> clusters.

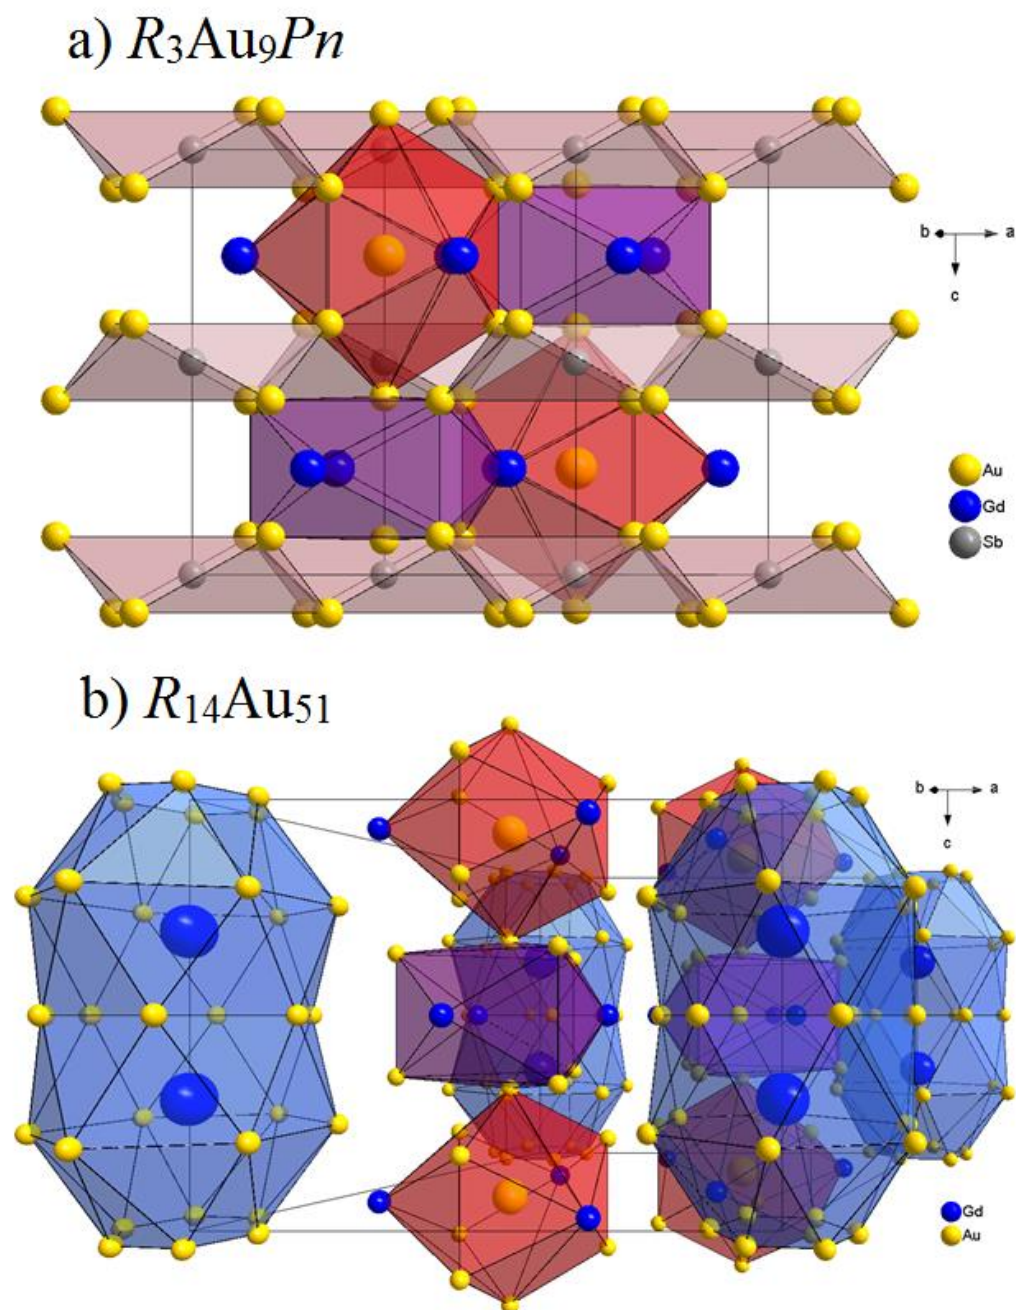

**Figure S3.** Comparison of coordination polyhedral observed in  $R_3\text{Au}_9\text{Pn}$  (a) and  $R_{14}\text{Au}_{51}$  (b). The red and purple polyhedra appear isostructural and are not present in the  $R_3\text{Au}_7\text{Sn}_3$  structure, demonstrating a previously unrecognized relationship between  $R_{14}\text{Au}_{51}$  and  $\text{Cu}_{10}\text{Sn}_3$  type structures.

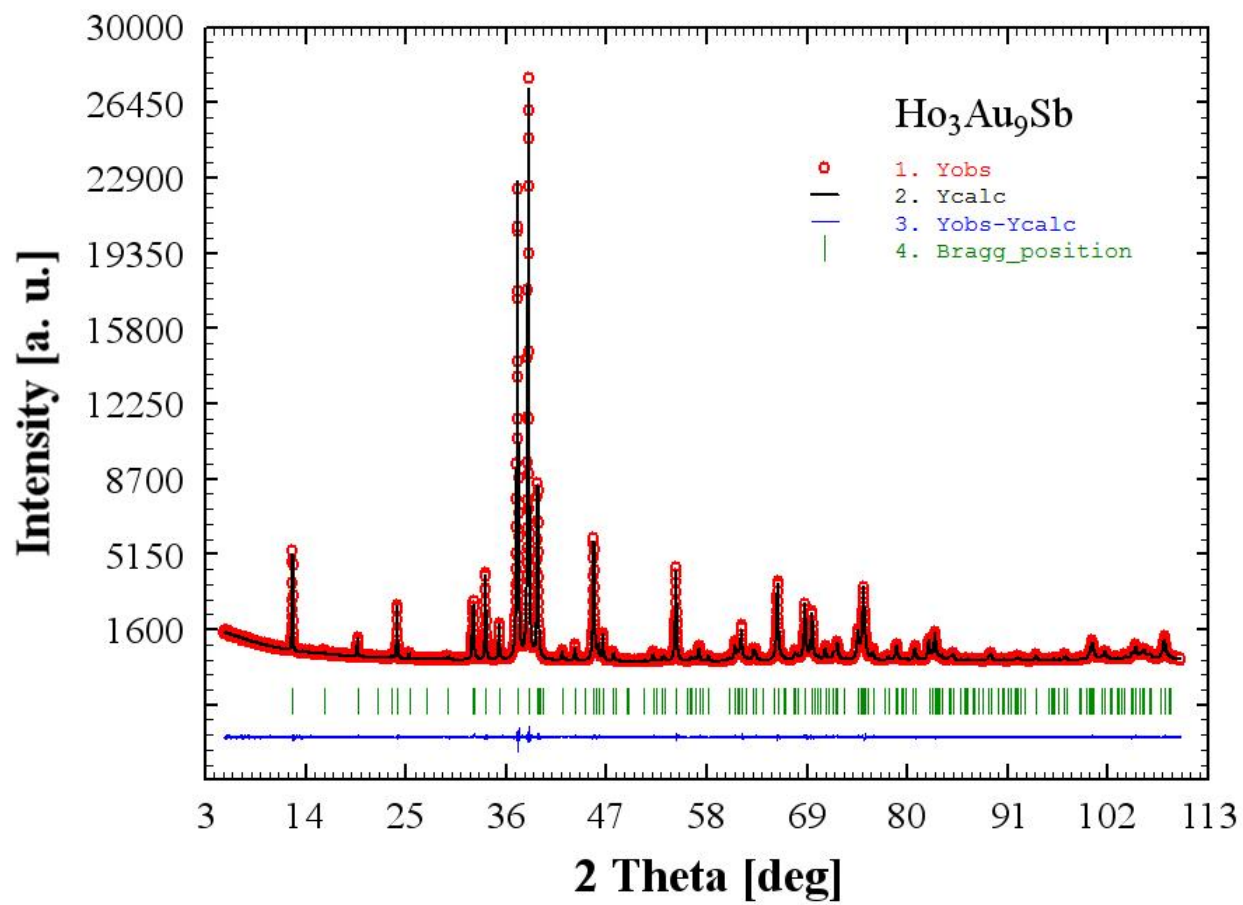

**Figure S4.** PXRD pattern of single phase  $\text{Ho}_3\text{Au}_9\text{Sb}$  used for magnetic testing.

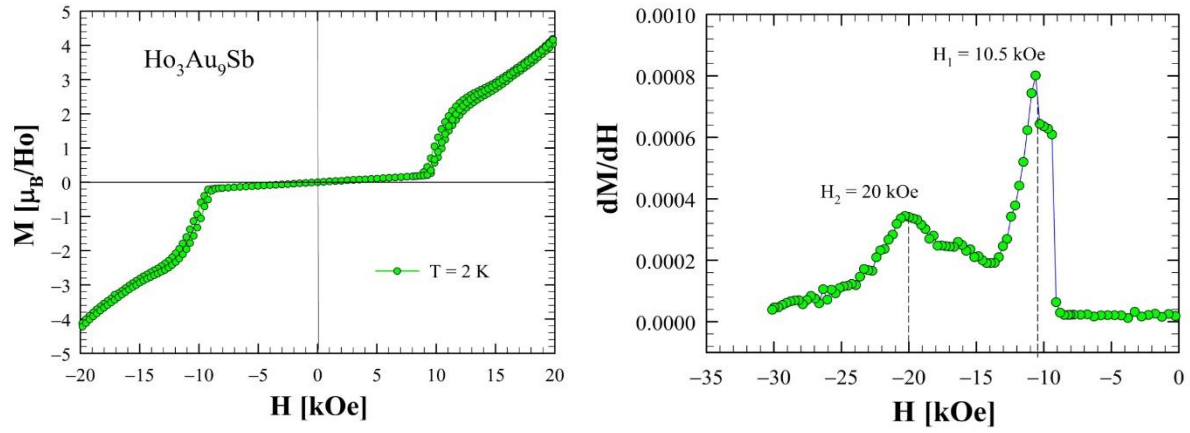

**Figure S5.** (left) A magnification of the isothermal magnetization in between  $\pm 20$  kOe showing magnetic hysteresis after the AFM region. (right) The derivative of the same isothermal magnetization curve showing peak positions used for determination of critical field values.

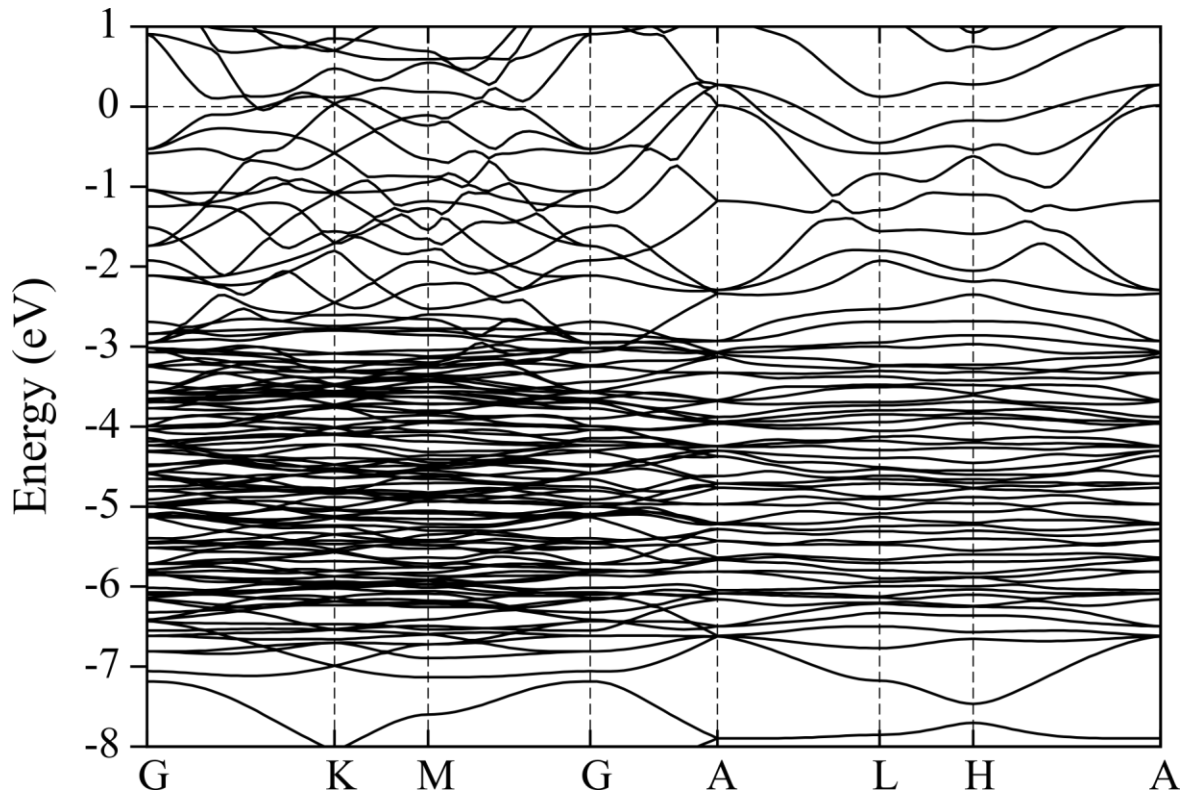

**Figure S6.** Band structure plot for  $\text{Y}_3\text{Au}_9\text{Sb}$ .

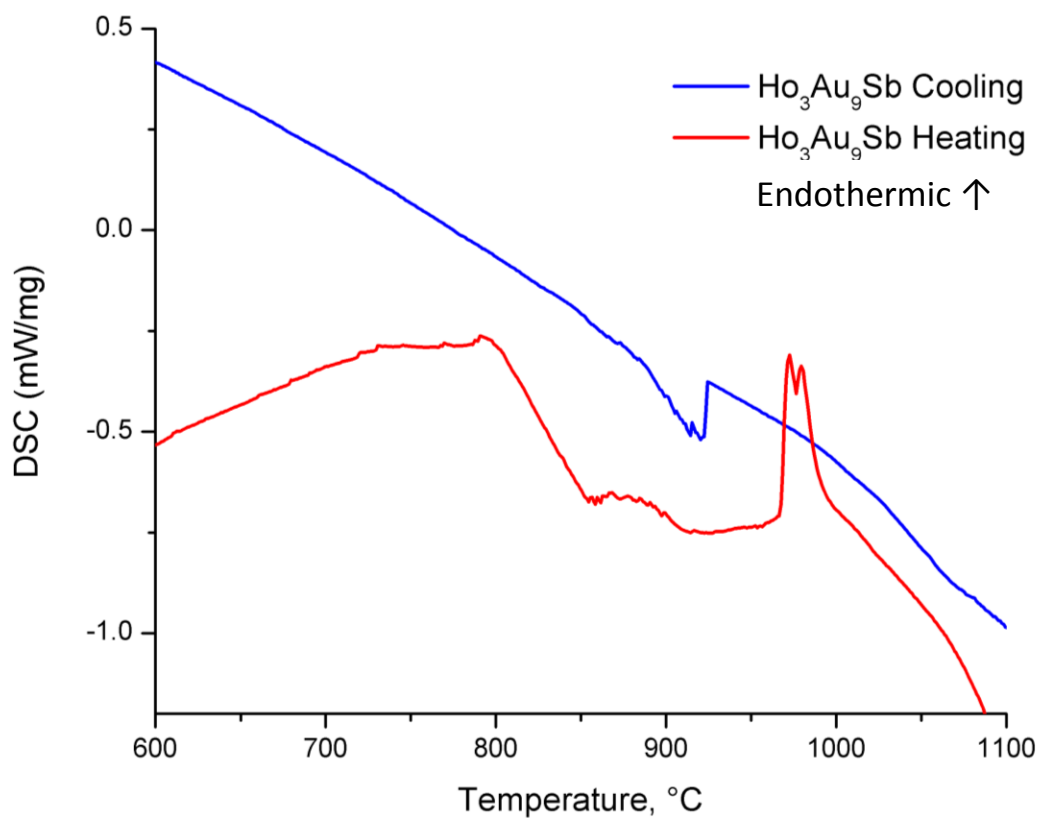

**Figure S7.** DSC plot for the  $\text{Ho}_3\text{Au}_9\text{Sb}$  sample recorded on heating and cooling at 20 °C/min for both measurements.
